# Supplementary material for: Suppressor of fused controls cerebellum granule cell proliferation by suppressing Fgf8 and spatially regulating Gli proteins
Source: Oxford University Press journal article supplement (doi:10.1242/dev.170274), 2020-01-13
Supplement: dev170274supp.pdf [file dev170274supp.pdf]

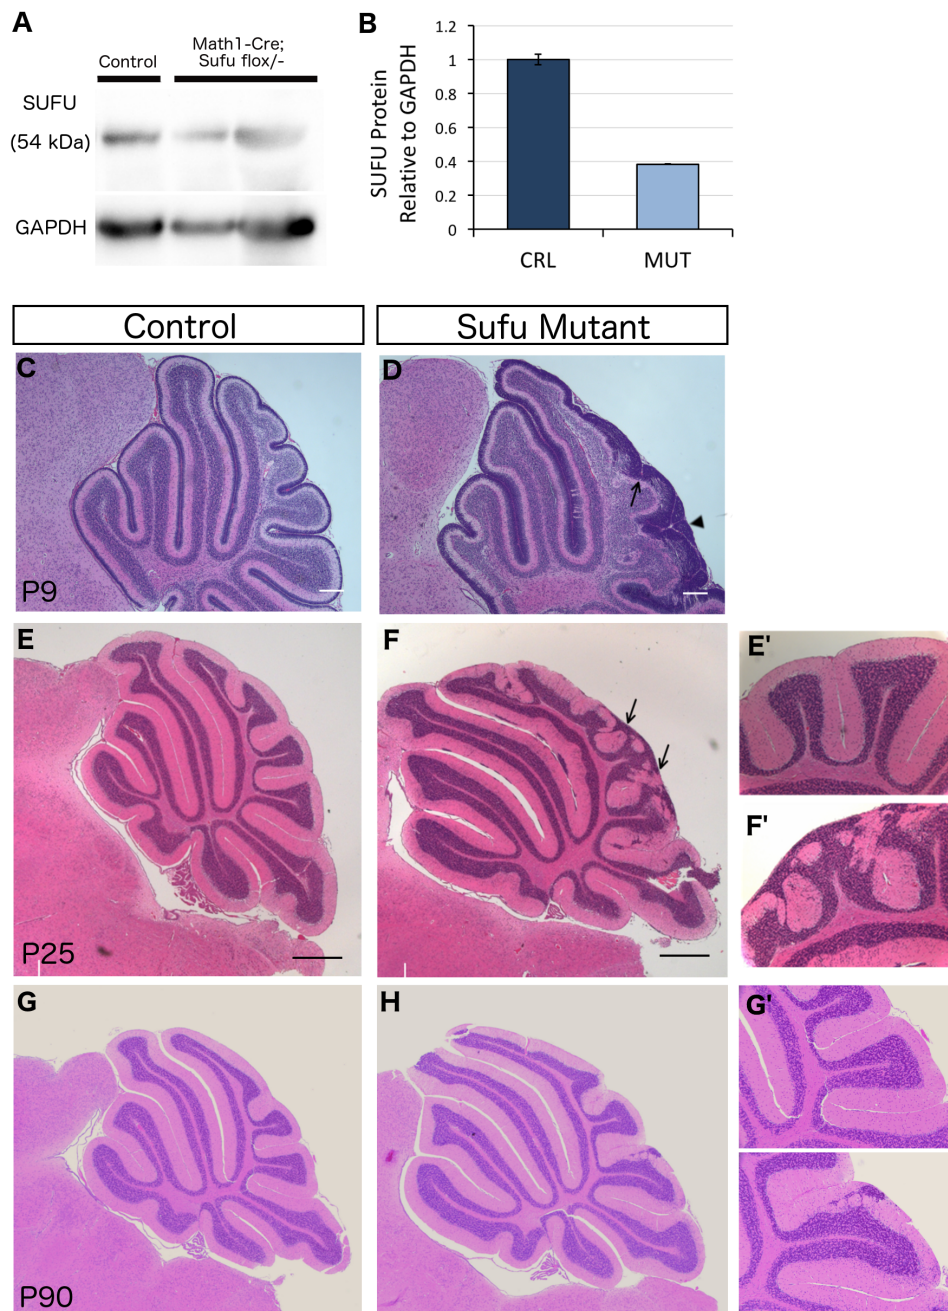

**Figure S1 – Sufu deletion causes EGL hyperplasia and GC migration defects.**

(A, B) Sufu protein is markedly in whole cerebellar lysate from P3 Sufu-mutant cerebella. (C-H) H&E stained sagittal sections from control and Sufu-mutant cerebella. The severely hyperplastic central lobules of P9 Sufu-mutant cerebella (D) display shallow fissures (arrow) and ectopic cell condensations (arrowhead) overlying the cerebellar surface. (E, F) The EGL is depleted by P25 in control (E), but not in Sufu-mutant cerebella (F) which displays ectopic EGL/ML cells and the absence of fissures between central lobules (arrows). (G, H) Ectopic ML cells and foliation abnormalities persist as late as P90. Scale bars: 200  $\mu$ m.

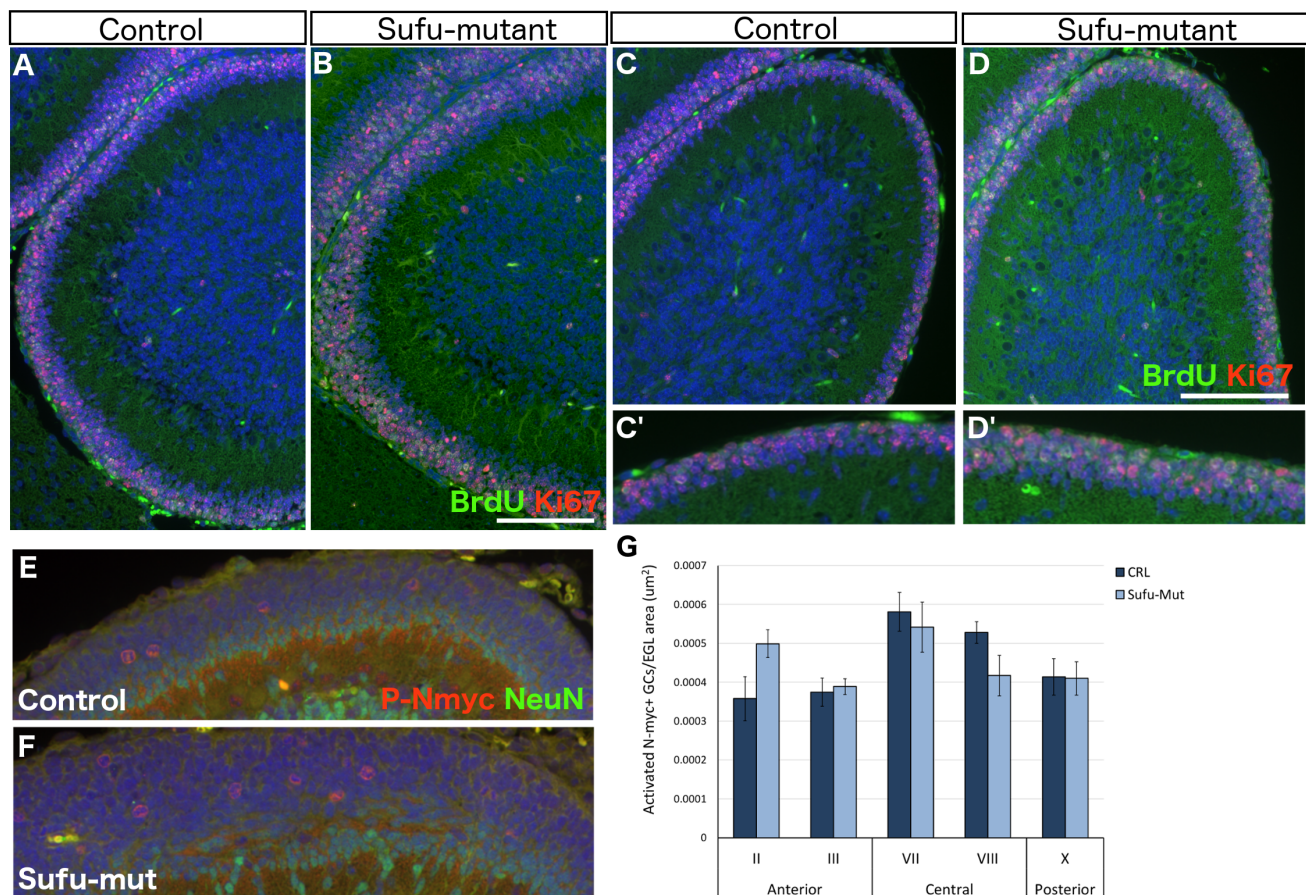

### Figure S2 – GCP proliferation is increased across the Sufu-mutant cerebellum

(A-D) BrdU and Ki67 immunostaining in control (A, C) and Sufu-mutant (B, D) cerebella shown in representative anterior lobule (III) (A, B) and posterior lobule (X) (C, D). The EGL is noticeably thicker in Sufu-mutant lobules (B, D) and displays a greater number of BrdU+ (green) and Ki67+ (red) cells. Nuclei are labelled with DAPI (blue). (C', D') Higher magnification of boxed regions in C, D respectively. (E-F) Immunofluorescence staining at P8 detected phosphorylated Nmyc (P-Nmyc) (red) in outer EGL GCPs, which lack NeuN expression (green). (G) Quantitation of the number of P-Nmyc+ cells relative to total EGL area per lobule revealed no change in Sufu-mutants compared to control (n=3). Cell counts were compared in corresponding anterior (II, III), central (VII, VIII), and posterior (X) lobules.



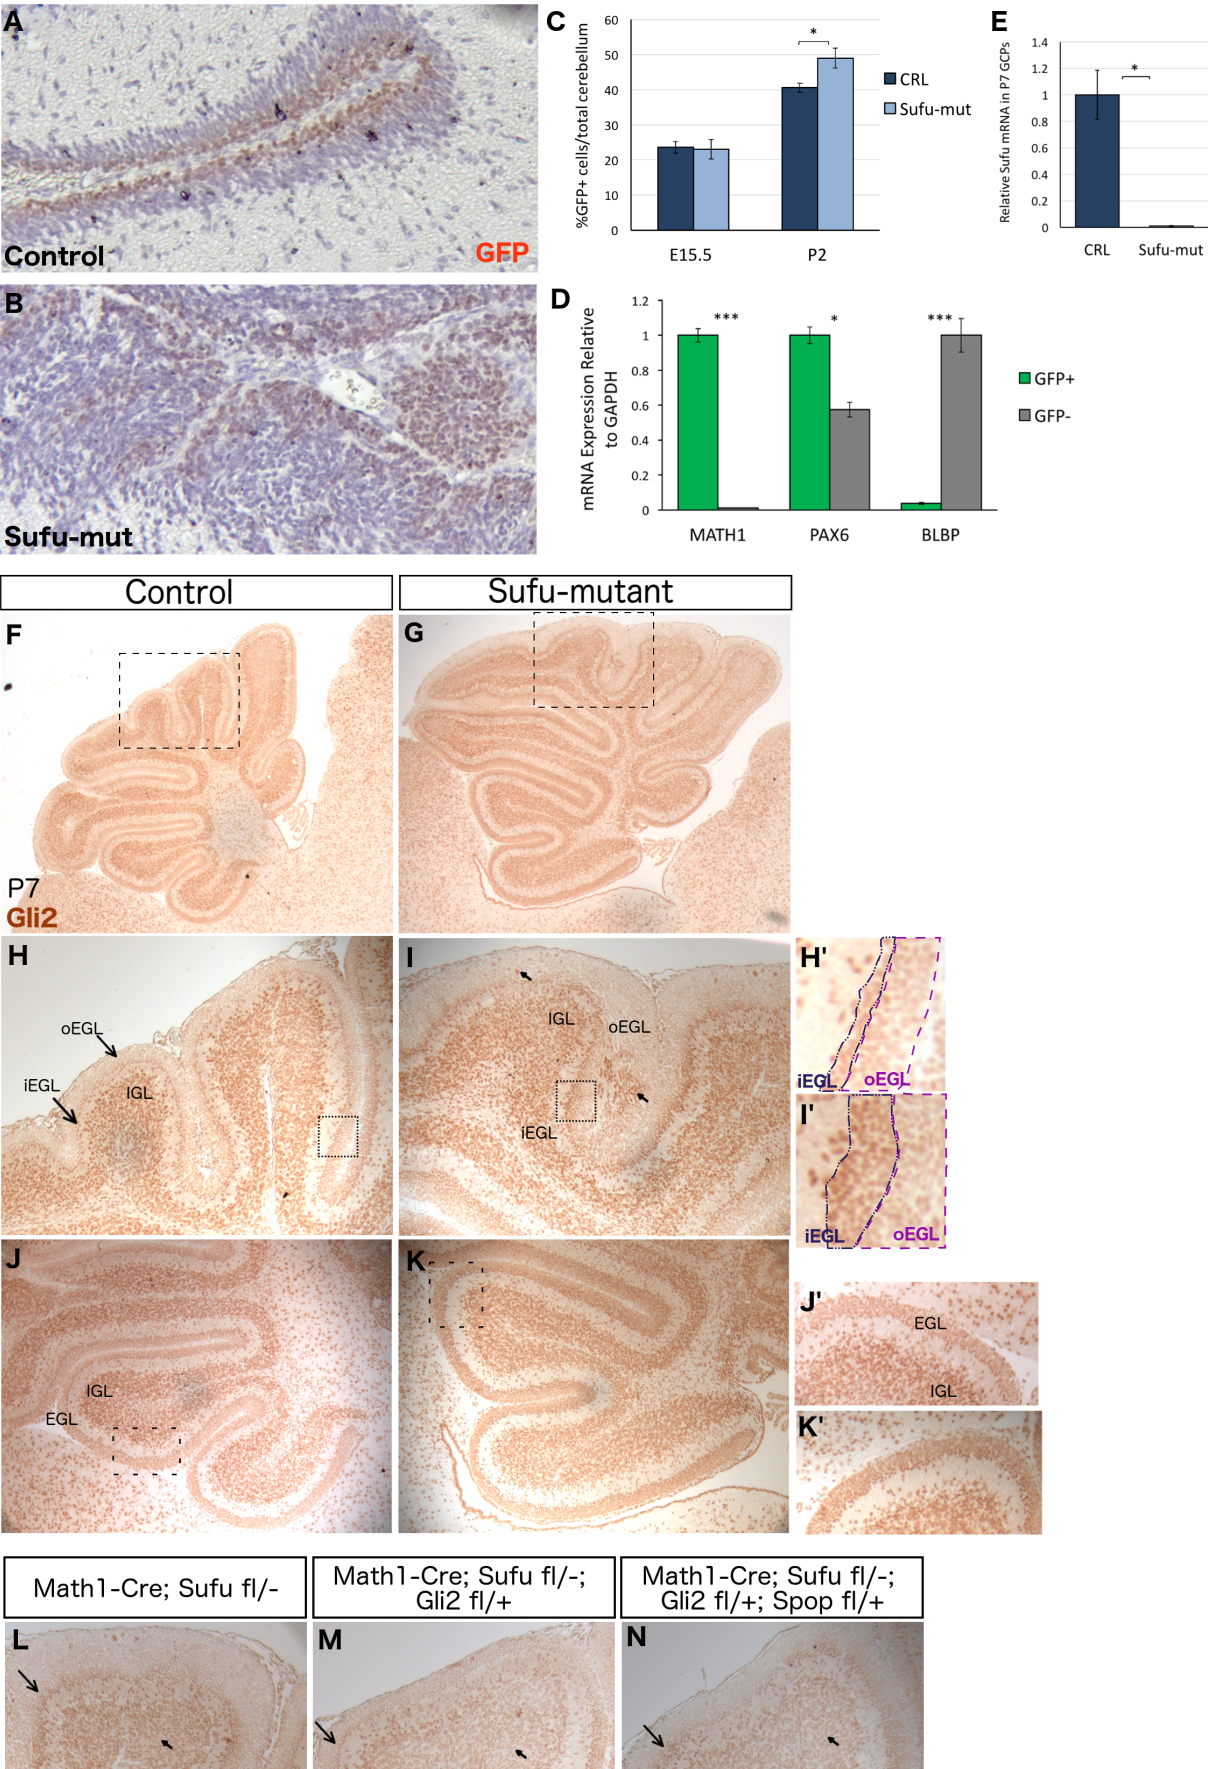

**Figure S3 — Analysis of Shh signalling in Sufu-mutant cerebella and FACS-extracted GCPs.**

(A, B) Math1-GFP expression labels cells in the outermost EGL, as shown by immunohistochemistry staining of control (A) and Sufu-mutant (B) cerebella. (C) Math1-GFP-expressing cells isolated from cell suspensions of control and Sufu-mutant cerebella. A significantly greater number of cells is isolated from Sufu-mutant cerebella at postnatal (n=13 ctrl, 7 Sufu-mut), but not embryonic (n=27 ctrl, 7 Sufu-mut) stages. (D) qRT-PCR analysis confirms absence of Sufu expression in FACS-purified cells from Sufu-mutant cerebella. (E) qRT-PCR analysis confirms enriched expression of GCP markers, Math1 and Pax6, and near absence of radial glial marker Blbp, in the GFP+ fraction extracted by FACS (n=3). Data are represented as mean  $\pm$  SE. \*P<0.05; \*\*P<0.01; \*\*\*P<0.001. (F-N)

Immunohistochemistry staining demonstrates Gli2 expression in the control (F) and Sufu-mutant cerebellum (G). Gli2 expression appears increased in the Sufu-mutant inner EGL (as compared to control) and in localized cell aggregates of the outer EGL (arrow, I). (I'-K') Higher magnification images of boxed regions in I-K. (L-N) Gli2 staining is reduced in the inner EGL is reduced after the deletion of Gli2 (M) as compared to the Sufu-mutant (L). Gli2 staining is then upregulated again (arrow) upon the deletion of ubiquitin ligase Spop which degrades Gli2 (N).



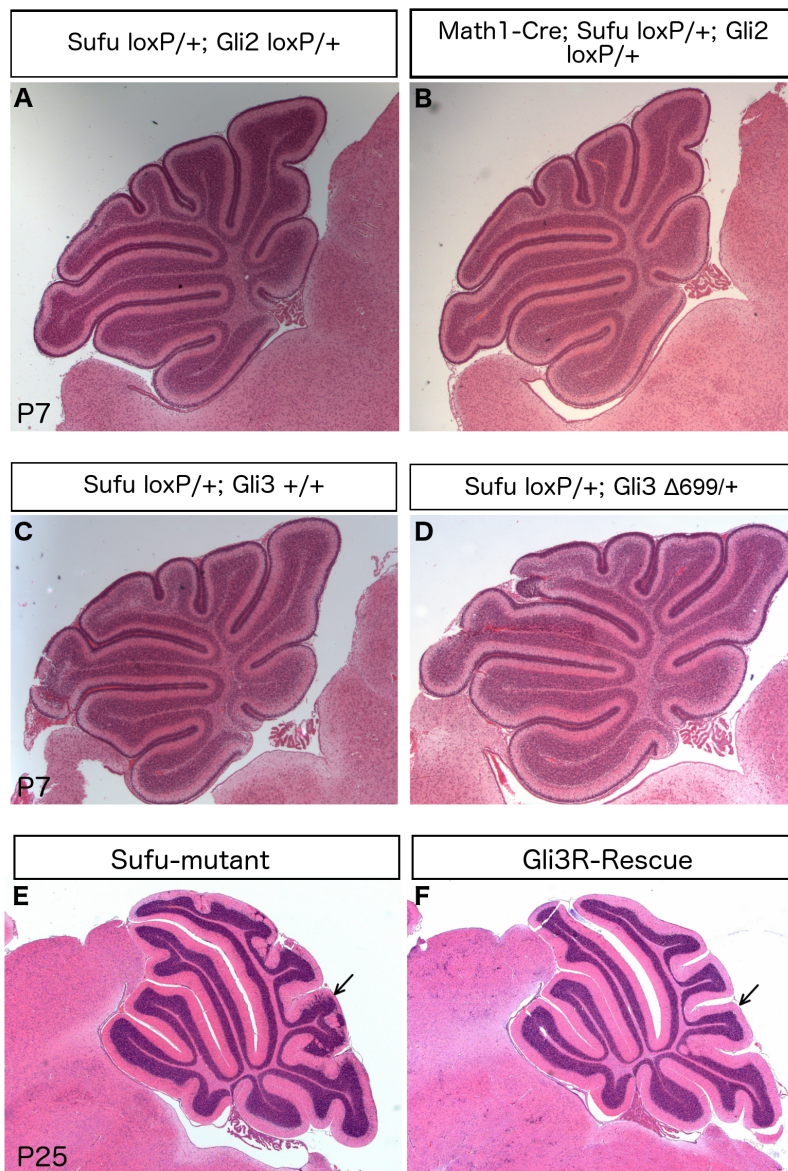

### Figure S4 – Manipulation of Gli2 or Gli3R does not independently affect the EGL.

(A, B) Heterozygous deletion of Gli2 from GCPs in control cerebella (B) does not reduce or deplete the EGL, which appears comparable to wild-type (A). (C, D) Control cerebella expressing Gli3<sup>Δ699</sup> (D) appear indistinguishable from wild-type (C). (E, F) P25 cerebella demonstrate that Gli3R Rescue cerebella (F) lack ectopic cells which are observed to persist in the EGL/ML of Sufu-mutant cerebella at later stages (E).

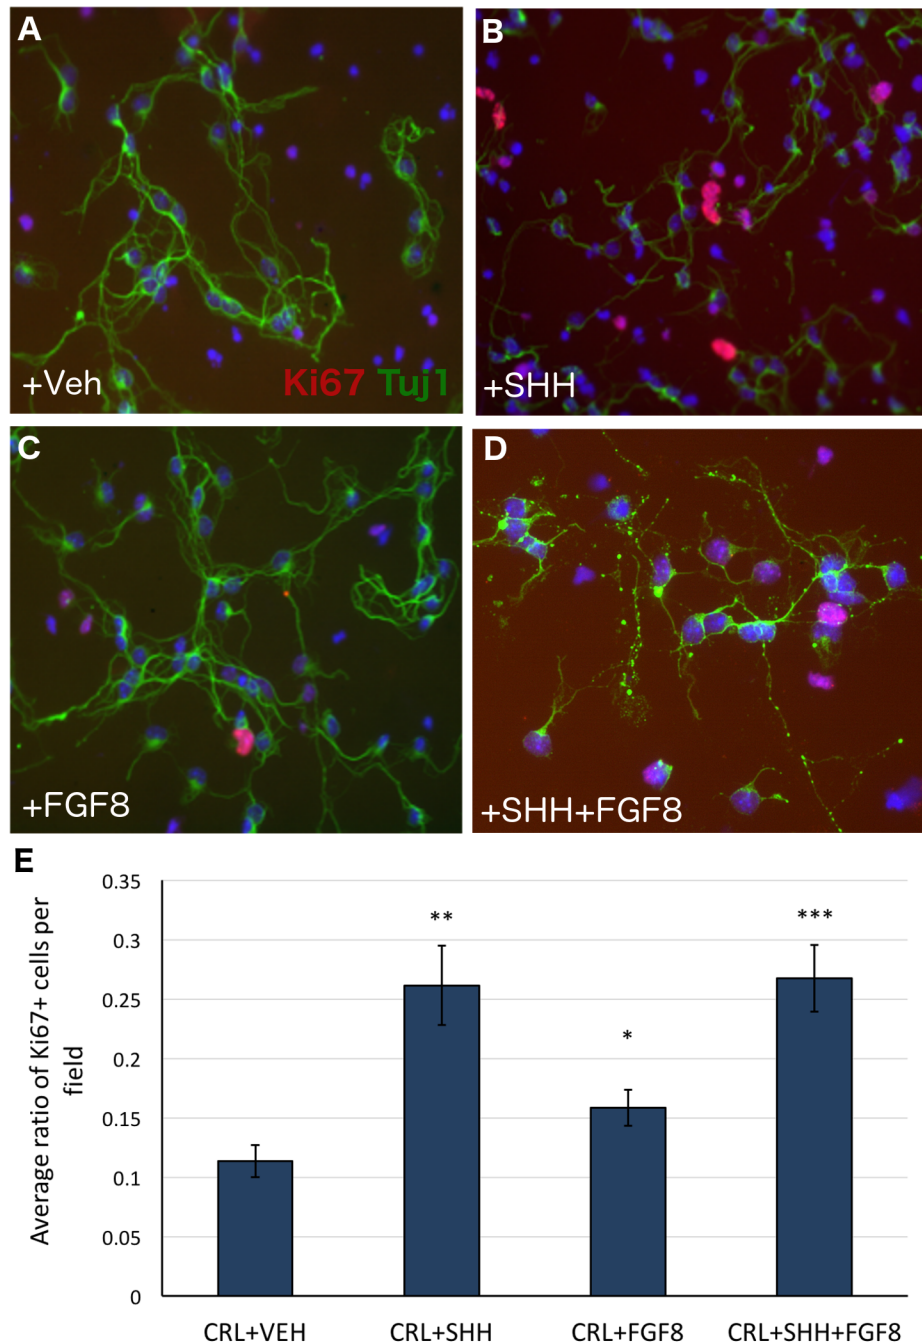

### Figure S5 – Fgf8 stimulates GCP proliferation.

(A-D) FACS-purified wild-type GCPs cultured over 4 days with recombinant Shh, Fgf8b or vehicle (n=3 biological replicates/condition). Vehicle-treated GCPs generally lacked Ki67 expression (A), while Shh treatment robustly induced Ki67 (B). Elevated Ki67 expression was also observed in Fgf8-treated (C) and Shh+Fgf8 treated (D) GCPs. (E) Quantitation analyses confirmed that Fgf8 treatment significantly increases the ratio of Ki67+ cells relative to control. Two-tailed unpaired Student's t-test \*P<0.05; \*\*P<0.01; \*\*\*P<0.001.



**Table S1** – List of differentially regulated genes detected by RNA-Seq, organized by fold-change in expression in P2 Sufu-mutant cerebella relative to control. Adjusted P value (P-adj) < 0.05.

| Gene ID        | Gene Name                                                                                      | P-adj Value | Fold Change |
|----------------|------------------------------------------------------------------------------------------------|-------------|-------------|
| <i>Fgf8</i>    | Fibroblast growth factor 8                                                                     | 9.92E-07    | 2.24        |
| <i>Plagl1</i>  | Pleiomorphic adenoma gene-like 1                                                               | 3.32E-06    | 1.54        |
| <i>Chrn4</i>   | cholinergic receptor, nicotinic, beta 4                                                        | 9.04E-05    | 1.86        |
| <i>Crnmt1</i>  | Carnosine n-methyl transferase1                                                                | 0.00054     | 1.79        |
| <i>Cldn2</i>   | Claudin-2                                                                                      | 0.0013      | 1.74        |
| <i>Insm2</i>   | insulinoma-associated 2                                                                        | 0.0014      | 1.83        |
| <i>Car12</i>   | carbonic anhydrase 12                                                                          | 0.0031      | 1.69        |
| <i>Bmp5</i>    | bone morphogenetic protein 5                                                                   | 0.0033      | 1.67        |
| <i>Otx2</i>    | orthodenticle homeobox2                                                                        | 0.0033      | 1.50        |
| <i>Itga8</i>   | integrin, alpha 8                                                                              | 0.0035      | 1.58        |
| <i>Abca4</i>   | ATP-binding cassette, subfamily A, member 4                                                    | 0.0048      | 1.49        |
| <i>Defb11</i>  | Defensin beta 11                                                                               | 0.0048      | 1.75        |
| <i>Nmrk1</i>   | nicotinamide riboside kinase 1                                                                 | 0.0048      | 1.76        |
| <i>Sowaha</i>  | soosondowah ankyrin repeat domain family member A                                              | 0.0048      | 1.68        |
| <i>Kl</i>      | klotho                                                                                         | 0.0053      | 1.65        |
| <i>Slc4a5</i>  | Solute carrier family 4, sodium bicarbonate cotransporter, member 5                            | 0.0058      | 1.66        |
| <i>Trpv4</i>   | transient receptor potential cation channel, subfamily V, member 4                             | 0.0077      | 1.63        |
| <i>Thrsp</i>   | thyroid hormone responsive                                                                     | 0.0084      | 1.69        |
| <i>Abcc9</i>   | ATP-binding cassette, subfamily C (CFTR/MR), member 9                                          | 0.0086      | 1.37        |
| <i>Frem1</i>   | Fras1 related extracellular matrix protein                                                     | 0.0100      | 1.48        |
| <i>Ntf3</i>    | Neurotrophin 3                                                                                 | 0.0162      | 1.62        |
| <i>Clic6</i>   | chloride intracellular channel 6                                                               | 0.0200      | 1.56        |
| <i>Adamts1</i> | a disintegrin-like and metalloproteinase (reprolysin type) with thrombospondin type 1 motif, 1 | 0.0207      | 1.54        |
| <i>Cep162</i>  | centrosomal protein 162                                                                        | 0.0210      | 1.36        |
| <i>Zgrf1</i>   | zinc-finger GRF-type containing 1                                                              | 0.0210      | 1.39        |

|                 |                                                                               |         |      |
|-----------------|-------------------------------------------------------------------------------|---------|------|
| <i>Wfikkn2</i>  | WAP, follistatin/kazal, immunoglobulin, kunitz and netrin domain containing 2 | 0.0213  | 1.56 |
| <i>Gmnc</i>     | geminin coiled-coil domain containing                                         | 0.0217  | 1.57 |
| <i>Fam84b</i>   | family with sequence similariy 84, member B                                   | 0.0234  | 1.44 |
| <i>Akna</i>     | AT-hook transcription factor                                                  | 0.0241  | 1.49 |
| <i>Prtg</i>     | protogenin                                                                    | 0.0288  | 1.45 |
| <i>Vwa5b1</i>   | von Willebrand factor A domain containing 5B1                                 | 0.0333  | 1.47 |
| <i>Etv5</i>     | ets variant 5                                                                 | 0.0342  | 1.52 |
| <i>Prex2</i>    | phosphatidylinositol-3,4,5-trisphosphate-dependent Rac exchange factor 2      | 0.0351  | 1.47 |
| <i>Chrna3</i>   | cholinergic receptor, nicotinic, alpha polypeptide 3                          | 0.0417  | 1.44 |
| <i>Ranbp17</i>  | RAN binding protein 17                                                        | 0.0444  | 1.39 |
| <i>Baiap2l1</i> | BAI1-associated protein 2-like 1                                              | 0.0449  | 1.50 |
| <i>Tle6</i>     | trasnducin-like enhancer of split 6                                           | 0.0479  | 1.52 |
| <i>Cdc14b</i>   | cell division cycle 14B                                                       | 0.0493  | 1.41 |
| <i>Tmem72</i>   | transmembrane protein 72                                                      | 0.0497  | 1.58 |
| <i>Sufu</i>     | suppressor of fused                                                           | 0.00134 | 0.69 |
| <i>Neu4</i>     | neuraminidase/sialidase 4                                                     | 0.00856 | 0.61 |
| <i>Nefl</i>     | neurofilament, light polypeptide                                              | 0.00936 | 0.65 |
| <i>Krt19</i>    | keratin 19                                                                    | 0.00972 | 0.59 |
| <i>Slc2a6</i>   | solute carrier family 2 (facilitated glucose transporter), member 6           | 0.00972 | 0.63 |
| <i>Htr3a</i>    | 5-hydroxytryptamine (serotonin) receptor 3A                                   | 0.01005 | 0.59 |
| <i>Isl1</i>     | islet1/isl1 transcription factor                                              | 0.01399 | 0.59 |
| <i>Tppp3</i>    | tubulin polymerisation-promoting protein family member 3                      | 0.02099 | 0.68 |
| <i>Fbxo2</i>    | F-box protein 2                                                               | 0.02130 | 0.67 |
| <i>Calca</i>    | calcitonin/calcitonin-related polypeptide, alpha                              | 0.03640 | 0.62 |
| <i>Ecel1</i>    | endothelin converting enzyme-like 1                                           | 0.04443 | 0.63 |
